# Supplementary material for: Bis(dimethylsulfoxide)carbonateplatinum(ii), a new synthon for a low-impact, versatile synthetic route to anticancer Pt carboxylates
Source: Royal Society of Chemistry journal article supplement (doi:10.1039/c6dt01689h), 2016-01-01
Supplement: c6dt01689h1.pdf [file c6dt01689h1.pdf]

**Bis(dimethylsulfoxide)carbonateplatinum(II), a new synthon for a low-impact, versatile synthetic route to anticancer Pt carboxylates.**

**Paola Bergamini<sup>a\*</sup>, Lorenza Marvelli<sup>a</sup>, Valeria Ferretti<sup>a</sup>, Chiara Gemmo<sup>b</sup>, Roberto Gambari<sup>b</sup>, Yekatsiaryna Hushcha<sup>a</sup> and Ilaria Lampronti<sup>b</sup>.**

<sup>a</sup>Dipartimento di Scienze Chimiche e Farmaceutiche, Università degli Studi di Ferrara, via Fossato di Mortara 17, 44121 Ferrara, Italy.

<sup>b</sup> Dipartimento di Scienze della Vita e Biotecnologie, Sezione di Biochimica e Biologia Molecolare, Università degli Studi di Ferrara, Via Fossato di Mortara 74, 44121 Ferrara, Italy.

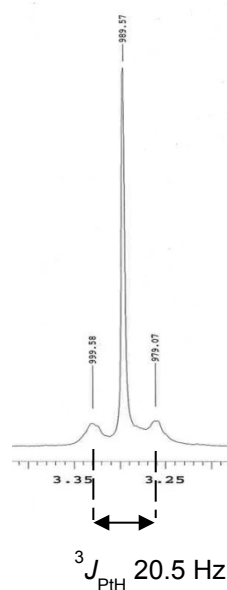

**Fig. S1** - <sup>1</sup>H NMR signal of S-coordinated DMSO in complex **1** in D<sub>2</sub>O (300 MHz)

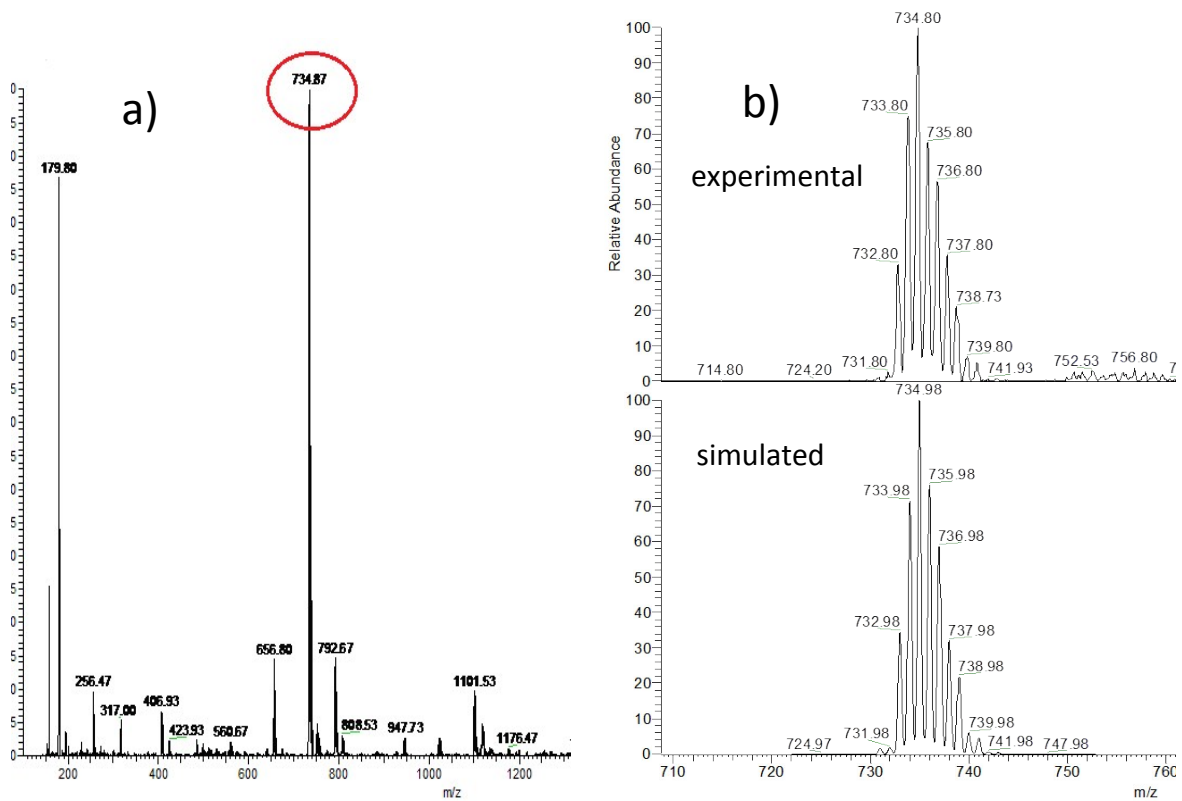

**Fig. S2** – a) MS-ESI spectrum of **1**; b) experimental and simulated signal of  $[(\text{Me}_2\text{SO-S})_4\text{Pt}_2\mu(\text{O})\mu(\text{OH})]^+$ .

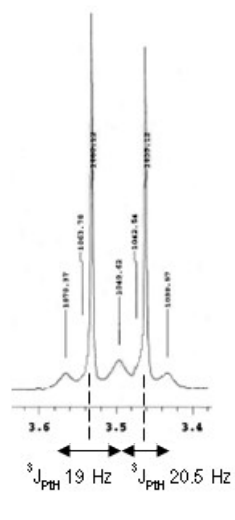

**Fig. S3** – Overlapped  $^1\text{H}$ -NMR signals of coordinated inequivalent DMSO in complex **4** (acetone- $\text{d}_6$ , 300 MHz)

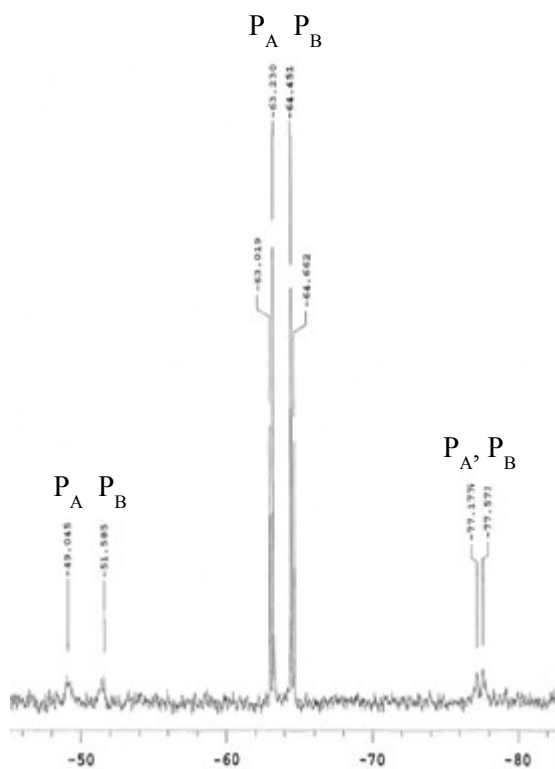

**Fig. S4** –  $^{31}\text{P}$  NMR of complex **7** in DMSO (121.50 MHz)

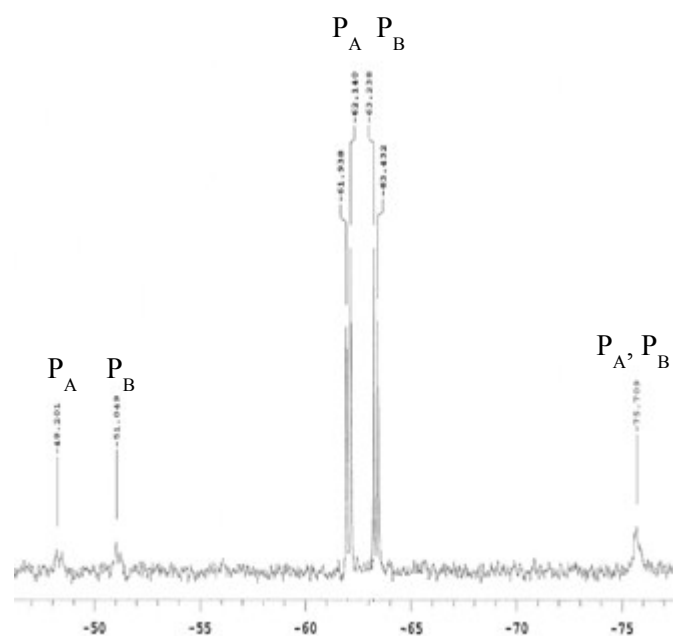

**Fig. S5** –  $^{31}\text{P}$  NMR of complex **8** in DMSO (121.50 MHz).

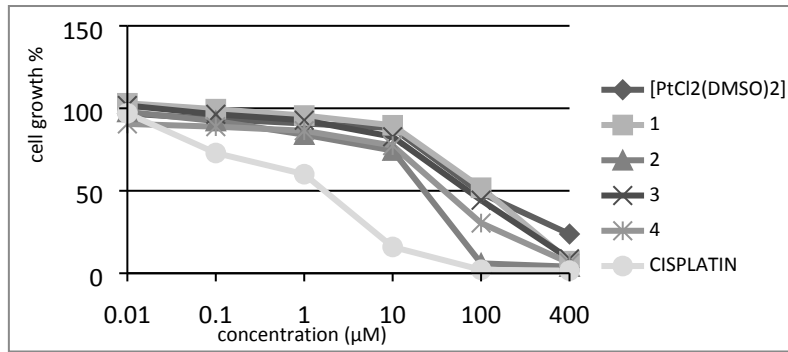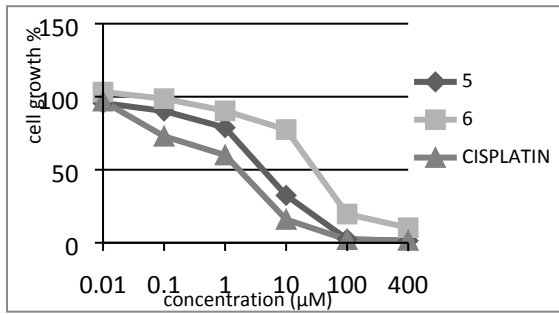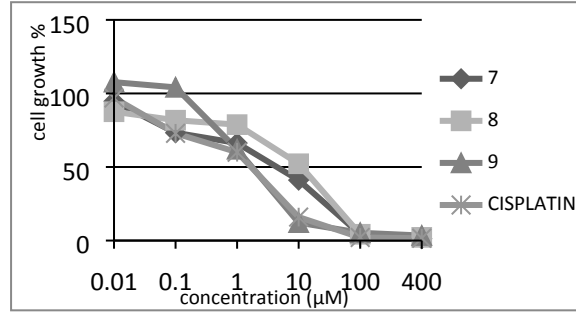

**Fig. S6** – Inhibitory effects on cell proliferation of A2780 cell line.

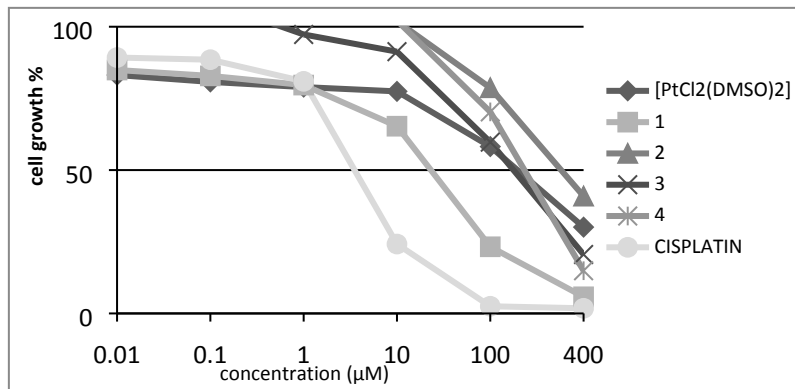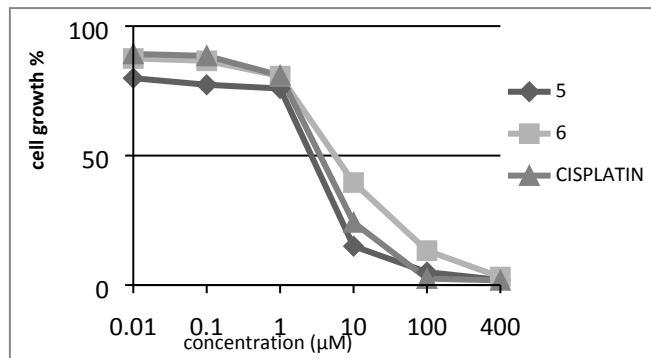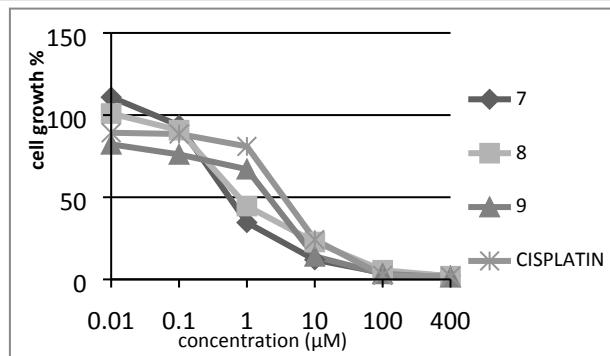

**Fig. S7** – Inhibitory effects on cell proliferation of SKOV-3 line.

**New synthesis of known compounds: carbonate substitution with O-donor ligands.  
Characterization of the products.**

**A) Reaction of 1 with cyclohexanedicarboxylic acid (CBDC): a new way to [Pt(CBDC)(Me<sub>2</sub>SO-S)<sub>2</sub>] (A) (ref 16)**

Complex [PtCO<sub>3</sub>(Me<sub>2</sub>SO-S)<sub>2</sub>] (50 mg, 1.2 · 10<sup>-4</sup> mol, MW 411.2 g/mol), solubilized in 5 mL of H<sub>2</sub>O, was put under vigorous stirring at room temperature. CBDC (17 mg, 1.2 · 10<sup>-4</sup> mol, MW 144.1 g/mol, 1 eq), solubilized in H<sub>2</sub>O, was added dropwise. The solution was left for 20 hours under vigorous stirring. The solution was then taken to dryness leaving [Pt(CBDC)(Me<sub>2</sub>SO-S)<sub>2</sub>] as a cream solid (42 mg, 8.5 · 10<sup>-5</sup> mol, MW 493.2 g/mol, yield 71%), soluble in H<sub>2</sub>O and DMSO. <sup>1</sup>H NMR (D<sub>2</sub>O): δ = 1.8 (m, 2H, CH<sub>2</sub>), 2.64 (m, 4H, CH<sub>2</sub>), 3.4 (s, 6H, DMSO) ppm. <sup>13</sup>C NMR (D<sub>2</sub>O): δ = 16.13 and 31.52 (3 CH<sub>2</sub> of CBDA), 42.80 (CH<sub>3</sub> of DMSO), 56.53 (C), 180.22 (COO).

**B) Reaction of 1 with malonic acid: a new way to [Pt(malonate)(Me<sub>2</sub>SO-S)<sub>2</sub>] (B).**

Complex [PtCO<sub>3</sub>(Me<sub>2</sub>SO-S)<sub>2</sub>] (50 mg, 1.22 · 10<sup>-4</sup> mol, MW 411.2 g/mol), solubilized in 10 mL of CH<sub>3</sub>OH, was put under vigorous stirring. Malonic acid (13 mg, 1.22 · 10<sup>-4</sup> mol, MW 104.1 g/mol, 1eq), solubilized in 5 mL of CH<sub>3</sub>OH, was added to the first solution. No change of color or precipitate was observed. The solution was left for 2 hours under the stirring, then it was taken to dryness by rotary evaporator and the solid residue was dried under vacuum over P<sub>2</sub>O<sub>5</sub> for one night. Complex **B** was obtained as a white solid (40 mg, 8.83 · 10<sup>-5</sup> mol, MW 453.16 g/mol, 72%). <sup>1</sup>H NMR (CD<sub>3</sub>OD): δ = 2.63 (s, 2H, CH<sub>2</sub>), 3.46 (s, <sup>3</sup>J<sub>PtH</sub> 20.5 Hz, 12 H, DMSO) ppm. <sup>13</sup>C NMR (CD<sub>3</sub>OD): δ = 40.39 (s, CH<sub>2</sub>), 42.72 (s, CH<sub>3</sub>, DMSO), 175.85 (s, COO) ppm. <sup>195</sup>Pt NMR: δ = -3193 ppm

*Exchange of DMSO for PPh<sub>3</sub> to give [Pt(malonate)(PPh<sub>3</sub>)<sub>2</sub>](NMR experiment in DMSO):*

<sup>31</sup>P NMR (DMSO-d<sub>6</sub>): δ = 9.47 (s, <sup>1</sup>J<sub>PtP</sub> 3910 Hz, PPh<sub>3</sub>) ppm.

**C) Reaction of 1 with oxalic acid: a new way to [Pt(oxalate)(Me<sub>2</sub>SO-S)<sub>2</sub>] (C).**

Complex **C** was prepared in the same condition as complex **B**, using oxalic acid (15 mg, 1.22 · 10<sup>-4</sup> mol, MW 126.1 g/mol, 1 eq). A white precipitate was immediately observed. The mixture was kept under stirring for 10 min and then filtered. The white solid product [Pt(oxalate)(Me<sub>2</sub>SO-S)<sub>2</sub>], **C**, was dried under vacuum (48 mg, 1.09 · 10<sup>-4</sup> mol, MW 439.5 g/mol, yield 89%). <sup>1</sup>H NMR (DMSO-d<sub>6</sub>): δ = 3.5 (s, 12H, <sup>3</sup>J<sub>HPT</sub> not resolved, DMSO) ppm.

*Exchange of DMSO for PPh<sub>3</sub> to give [Pt(oxalate)(PPh<sub>3</sub>)<sub>2</sub>](NMR experiment in DMSO or CDCl<sub>3</sub>):*

<sup>31</sup>P NMR (DMSO-d<sub>6</sub>): δ = 7.51 (s, <sup>1</sup>J<sub>PtP</sub> 3766 Hz) ppm. <sup>31</sup>P NMR (CDCl<sub>3</sub>): δ = 7.73 (s, <sup>1</sup>J<sub>PtP</sub> 3780 Hz) ppm.

**D) Reaction of 1 with L-carnitine to give [Pt(L-carnitine)(Me<sub>2</sub>SO-S)<sub>2</sub>]BF<sub>4</sub> (D)**

The synthesis and characterization of complex **D** has been described in ref 9.

C<sub>11</sub>H<sub>26</sub>BF<sub>4</sub>NO<sub>5</sub>PtS<sub>2</sub> (598): % found (% calc. for) C 21.90 (22.10), H 4.45 (4.38) and N 2.30 (2.34).

$^1\text{H}$  NMR (300 MHz  $\text{D}_2\text{O}$ , 25°C)  $\delta$  = 2.2 (bm, 2H,  $\text{CH}_2\text{COO}$ ), 3.1 (s, 9H,  $\text{Me}_3\text{N}^+$ ), 3.2 (m, 2H,  $\text{CH}_2\text{N}$ ), 3.5 (s, 12 H,  $\text{CH}_3$  DMSO), 4.2 (m, 1H, CHO) ppm.  $^1\text{H}$  NMR (300 MHz  $d_6$ -DMSO, 25°C)  $\delta$  = 2.2 (bm, 2H,  $\text{CH}_2\text{COO}$ ), 3.1 (s, 9H,  $\text{Me}_3\text{N}^+$ ), 3.3 (m, 12 H,  $\text{CH}_3$  of DMSO + 2H,  $\text{CH}_2\text{N}$ ), 4.2 (m, 1H, CHO) ppm.  $^{195}\text{Pt}$  NMR (85.64 MHz, DMSO, 25°C)  $\delta$  = -3193.5 ppm. MS-ESI: observed  $m/z$  511, calculated 511.4 for  $\text{C}_{11}\text{H}_{26}\text{NO}_5\text{PtS}_2$  ( $\text{M}^+$ ).



**Table S1.** Experimental details for **X-Ray Crystallography**

|                                                                                       | Complex 3                                                       | Complex 4                                                        | Complex 6                                                        |
|---------------------------------------------------------------------------------------|-----------------------------------------------------------------|------------------------------------------------------------------|------------------------------------------------------------------|
| Crystal data                                                                          |                                                                 |                                                                  |                                                                  |
| Chemical formula                                                                      | C <sub>11</sub> H <sub>22</sub> O <sub>8</sub> PtS <sub>2</sub> | C <sub>11</sub> H <sub>16</sub> O <sub>5</sub> Pt S <sub>2</sub> | C <sub>43</sub> H <sub>34</sub> O <sub>3</sub> P <sub>2</sub> Pt |
| $M_r$                                                                                 | 541.49                                                          | 487.44                                                           | 855.73                                                           |
| Crystal system,<br>space group                                                        | Orthorhombic, $P2_12_12_1$                                      | Monoclinic, $P2_1/c$                                             | Triclinic, $P-1$                                                 |
| $a, b, c$ (Å)                                                                         | 9.4289 (2), 10.5381<br>(2), 16.9406 (3)                         | 14.6904(2), 19.7530(4),<br>10.1449(4)                            | 11.2726 (2), 12.5875 (3),<br>14.9124 (3)                         |
| $\alpha, \beta, \gamma$ (°)                                                           | 90, 90, 90                                                      | 90, 95.117(1), 90                                                | 107.454 (1), 99.969 (1),<br>103.422 (1)                          |
| $V$ (Å <sup>3</sup> )                                                                 | 1683.26 (6)                                                     | 2932.1(1)                                                        | 1895.05 (7)                                                      |
| $Z$                                                                                   | 4                                                               | 8                                                                | 2                                                                |
| $\mu$ (mm <sup>-1</sup> )                                                             | 8.62                                                            | 9.86                                                             | 3.82                                                             |
| Crystal size (mm)                                                                     | 0.29 × 0.28 × 0.23                                              | 0.29 x 0.21 x 0.10                                               | 0.29 x 0.16 x 0.09                                               |
| No. of measured,<br>independent and<br>observed [ $I >$<br>$2\sigma(I)$ ] reflections | 15456, 4014, 3950                                               | 15507, 5659, 5137                                                | 29500, 9155, 7811                                                |
| $R_{int}$                                                                             | 0.064                                                           | 0.066                                                            | 0.059                                                            |
| $R[F^2 > 2\sigma(F^2)],$<br>$wR(F^2), S$                                              | 0.036, 0.099, 1.11                                              | 0.065, 0.188, 1.03                                               | 0.038, 0.099, 1.06                                               |
| No. of reflections                                                                    | 4014                                                            | 5659                                                             | 9155                                                             |
| No. of parameters                                                                     | 206                                                             | 343                                                              | 442                                                              |
| $\Delta\rho_{max}, \Delta\rho_{min}$ (e Å <sup>-3</sup> )                             | 2.47, -3.10                                                     | 2.70, -3.70                                                      | 1.00, -2.50                                                      |

**Table S2.** Selected Bond Distances and Angles and Geometrical Parameters for Intermolecular Interactions in **3** (Å, deg)

| Bond distances |          | Bond angles   |          |
|----------------|----------|---------------|----------|
| Pt1 - S1       | 2.224(3) | S1 - Pt1 - S2 | 93.44(1) |
| Pt1 - S2       | 2.216(3) | S1 - Pt1 - O3 | 92.04(2) |
| Pt1 - O3       | 2.016(7) | S2 - Pt1 - O5 | 90.90(2) |
| Pt1 - O5       | 1.984(8) | O3 - Pt1 - O5 | 83.46(3) |

| Intermolecular interactions |          |         |          |         |
|-----------------------------|----------|---------|----------|---------|
|                             | D-H      | D...A   | H...A    | D-H...A |
| O6-H...O5                   | 0.88(13) | 2.63(1) | 1.89(20) | 139(11) |
| C2-H...O2                   | 0.96     | 3.07(2) | 2.30     | 137     |
| O7-H...O6 <sup>i</sup>      | 0.82     | 2.74(1) | 1.95     | 160     |
| C1-H...O7 <sup>ii</sup>     | 0.96     | 3.31(2) | 2.41     | 155     |
| C2-H...O1 <sup>iii</sup>    | 0.96     | 3.22(1) | 2.31     | 157     |
| C4-H...O8 <sup>iv</sup>     | 0.96     | 3.24(2) | 2.31     | 160     |
| O8-H...O1 <sup>v</sup>      | 0.88(13) | 2.93(1) | 2.10(18) | 156(10) |

Symmetry code: (i)  $2-x, y+1/2, 1/2-z$ ; (ii)  $3/2-x, -y, z+1/2$ ; (iii)  $x+1/2, -y-1/2, 1-z$ ; (iv)  $1-x, y-1/2, 1/2-z$ ; (v)  $x+1/2, 1/2-y, 1-z$

**Table S3.** Selected Bond Distances and Angles and Geometrical Parameters for Intermolecular Interactions in **4** (Å, deg)

| Bond distances |          | Bond angles   |          |
|----------------|----------|---------------|----------|
| Pt1 - S1       | 2.221(2) | S1 - Pt1 - S2 | 91.89(8) |
| Pt1 - S2       | 2.221(2) | S1 - Pt1 - O1 | 86.9(2)  |
| Pt1 - O1       | 2.010(7) | S4 - Pt2 - O6 | 87.9(2)  |
| Pt1 - O3       | 1.992(7) | S2 - Pt1 - O3 | 89.7(2)  |
| Pt2 - S3       | 2.219(3) | S3 - Pt2 - S4 | 92.0(1)  |
| Pt2 - S4       | 2.225(3) | S3 - Pt2 - O8 | 88.0(2)  |
| Pt2 - O6       | 1.996(7) | O6 - Pt2 - O8 | 92.4(3)  |
| Pt2 - O8       | 2.004(7) | O1 - Pt1 - O3 | 91.5(3)  |

| Intermolecular interactions |      |         |       |         |
|-----------------------------|------|---------|-------|---------|
|                             | D-H  | D...A   | H...A | D-H...A |
| C8-H...O7                   | 0.96 | 3.19(1) | 2.37  | 143     |
| C9-H...O7                   | 0.96 | 3.15(1) | 2.37  | 138     |
| C8-H...O5 <sup>i</sup>      | 0.96 | 3.21(1) | 2.38  | 144     |
| C9-H...O4 <sup>ii</sup>     | 0.96 | 3.28(1) | 2.45  | 144     |
| C11-H...O2 <sup>iii</sup>   | 0.96 | 3.34(2) | 2.49  | 147     |
| C10-H...O2 <sup>iii</sup>   | 0.96 | 3.41(1) | 2.63  | 138     |
| C10-H...O9 <sup>iv</sup>    | 0.96 | 3.37(2) | 2.50  | 152     |
| C20-H...O2 <sup>v</sup>     | 0.96 | 3.36(2) | 2.53  | 145     |
| C19-H...O2 <sup>v</sup>     | 0.96 | 3.45(2) | 2.57  | 154     |

Symmetry codes: (i)  $x, 3/2-y, z+1/2$ ; (ii)  $x, 3/2-y, z-1/2$ ; (iii)  $-x, y+1/2, 3/2-z$ ; (iv)  $x-1, 3/2-y, z+1/2$ ; (v)  $1-x, 1-y, 1-z$

**Table S4.** Selected Bond Distances and Angles and Geometrical Parameters for Intermolecular Interactions in **6** (Å, deg)

| Bond distances |          | Bond angles   |           |
|----------------|----------|---------------|-----------|
| Pt1 - P1       | 2.253(1) | P1 - Pt1 - P2 | 100.12(5) |
| Pt1 - P2       | 2.255(1) | P2 - Pt1 - O1 | 83.18(1)  |
| Pt1 - O1       | 2.047(4) | P1 - Pt1 - O3 | 87.02(1)  |
| Pt1 - O3       | 2.013(5) | O1 - Pt1 - O3 | 90.04(2)  |

| Intermolecular interactions |      |           |       |         |
|-----------------------------|------|-----------|-------|---------|
|                             | D-H  | D...A     | H...A | D-H...A |
| C9-H9...O2 <sup>i</sup>     | 0.93 | 3.191(9)  | 2.44  | 138     |
| C30-H30...O2 <sup>ii</sup>  | 0.93 | 3.342(11) | 2.60  | 137     |

Symmetry codes: (i)  $x-1, y, z$ ; (ii)  $-x+1, -y, -z$
